# Supplementary material for: Construction and validation of a model based on immunogenic cell death-associated lncRNAs to predict prognosis and direct therapy for kidney renal clear cell carcinoma
Source: Aging (Albany NY). 2023 Jun 27;15(12):5304–38. doi: 10.18632/aging.204741 (PMC10333057; doi:10.18632/aging.204741)
Supplement: Supplementary Figures [file aging-15-204741-s001.pdf]

[www.aging-us.com](http://www.aging-us.com)

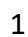

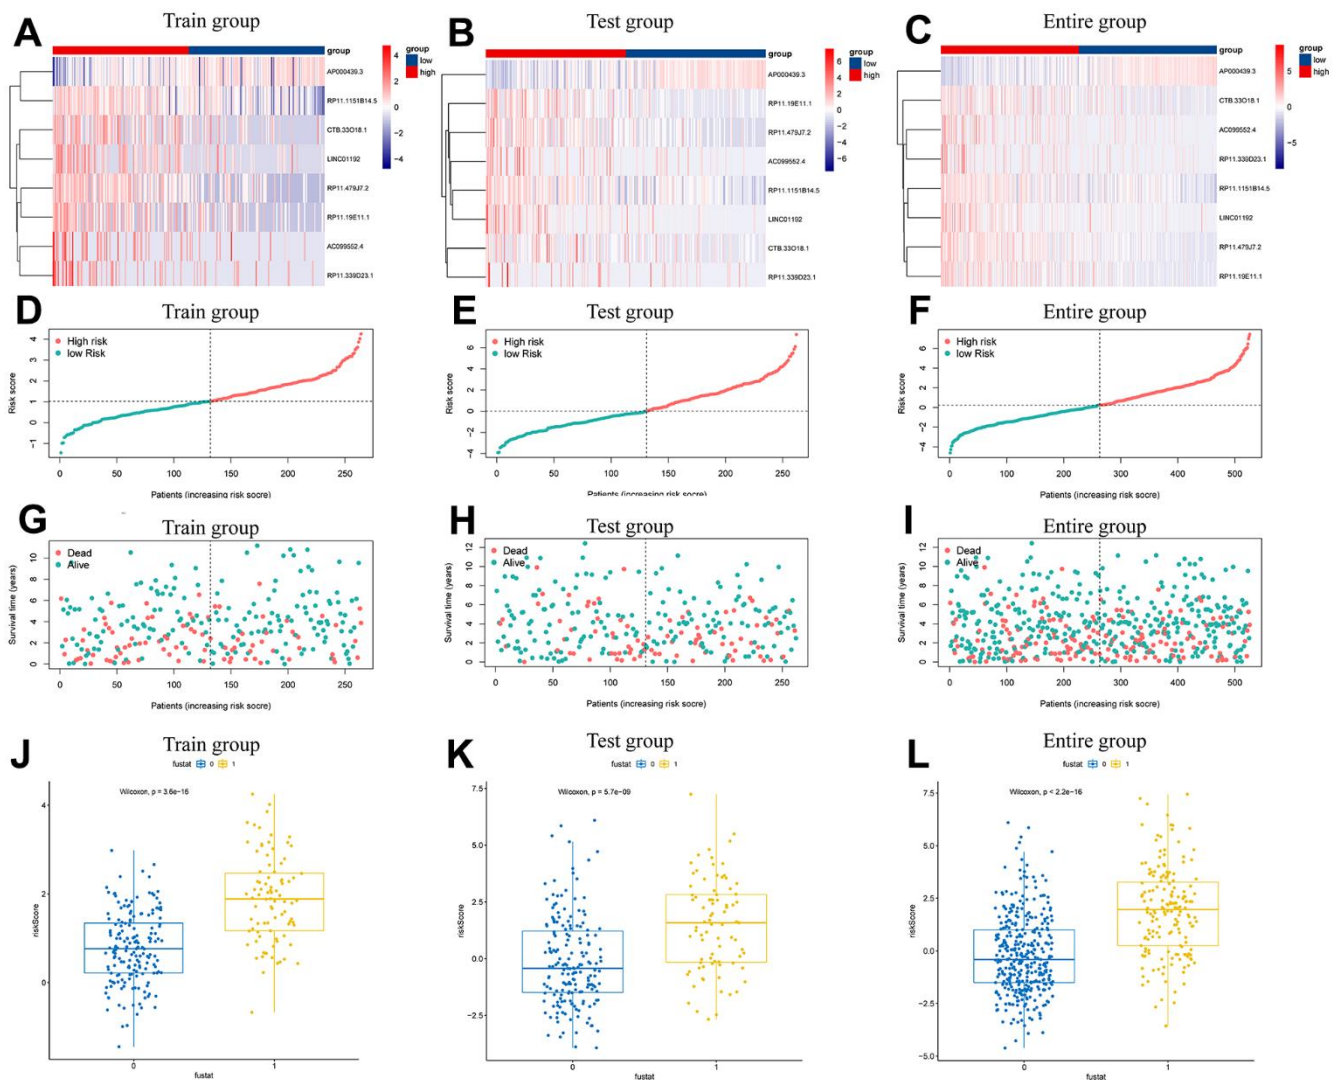

**Supplementary Figure 2. The model prediction effect is validated by the training group, test group, and the entire group.** Heat map of 8 ICD-related lncRNA expressions (A–C). Risk curve for risk scores (D–F) and Scatterplot (G–I) for the survival status of each patient; Scatterplot of risk scores of patients with different survival statuses (J–L).

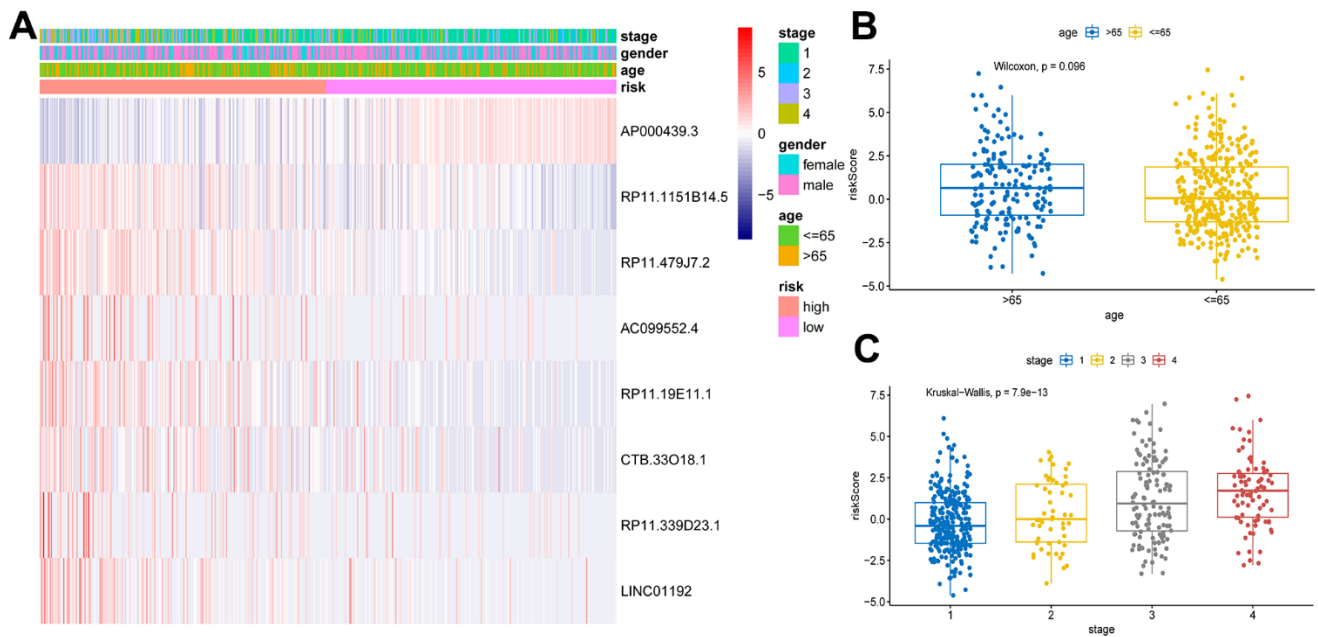

**Supplementary Figure 3. Further validation of model effects.** lncRNA signature expression heat map with clinical information (A); Correlation analysis of risk signature with age (B) and stage (C).

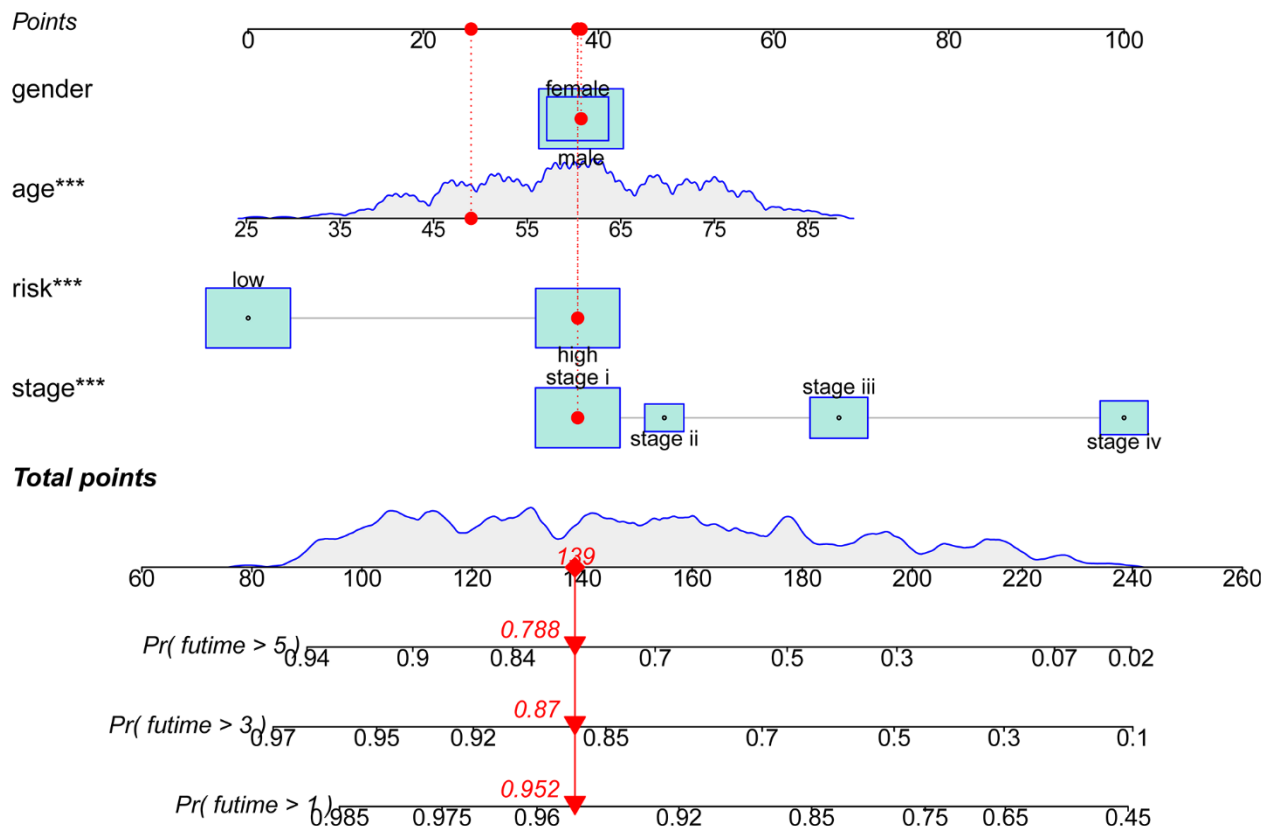

**Supplementary Figure 4. Nomogram with patient verification.**

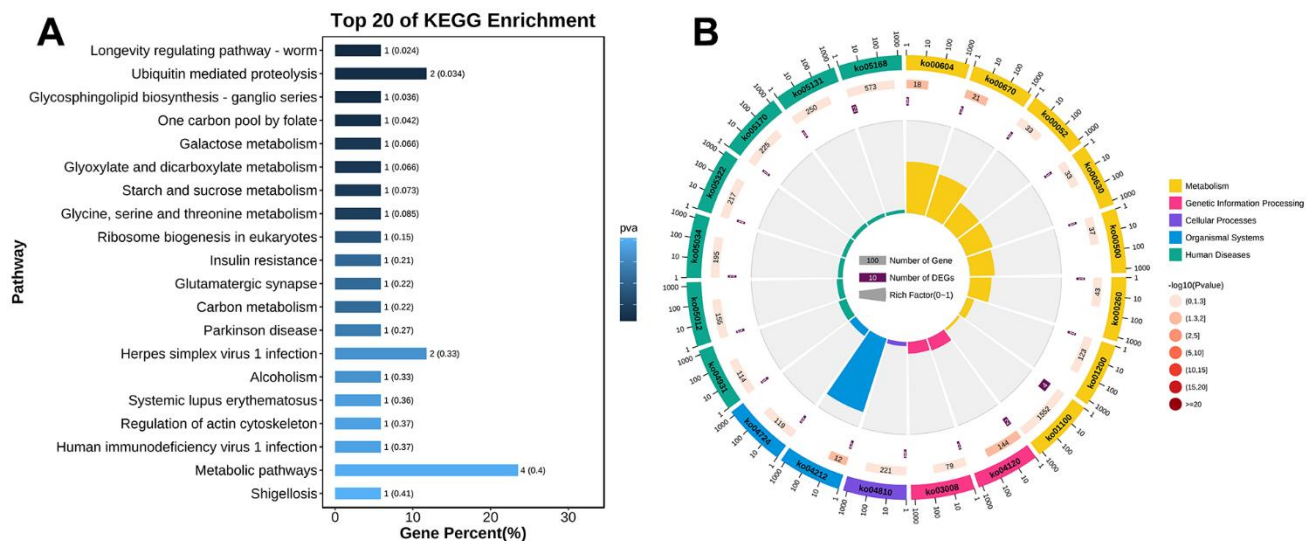

**Supplementary Figure 5. KEGG enrichment analysis. Bar chart (A); Circle chart (B).**

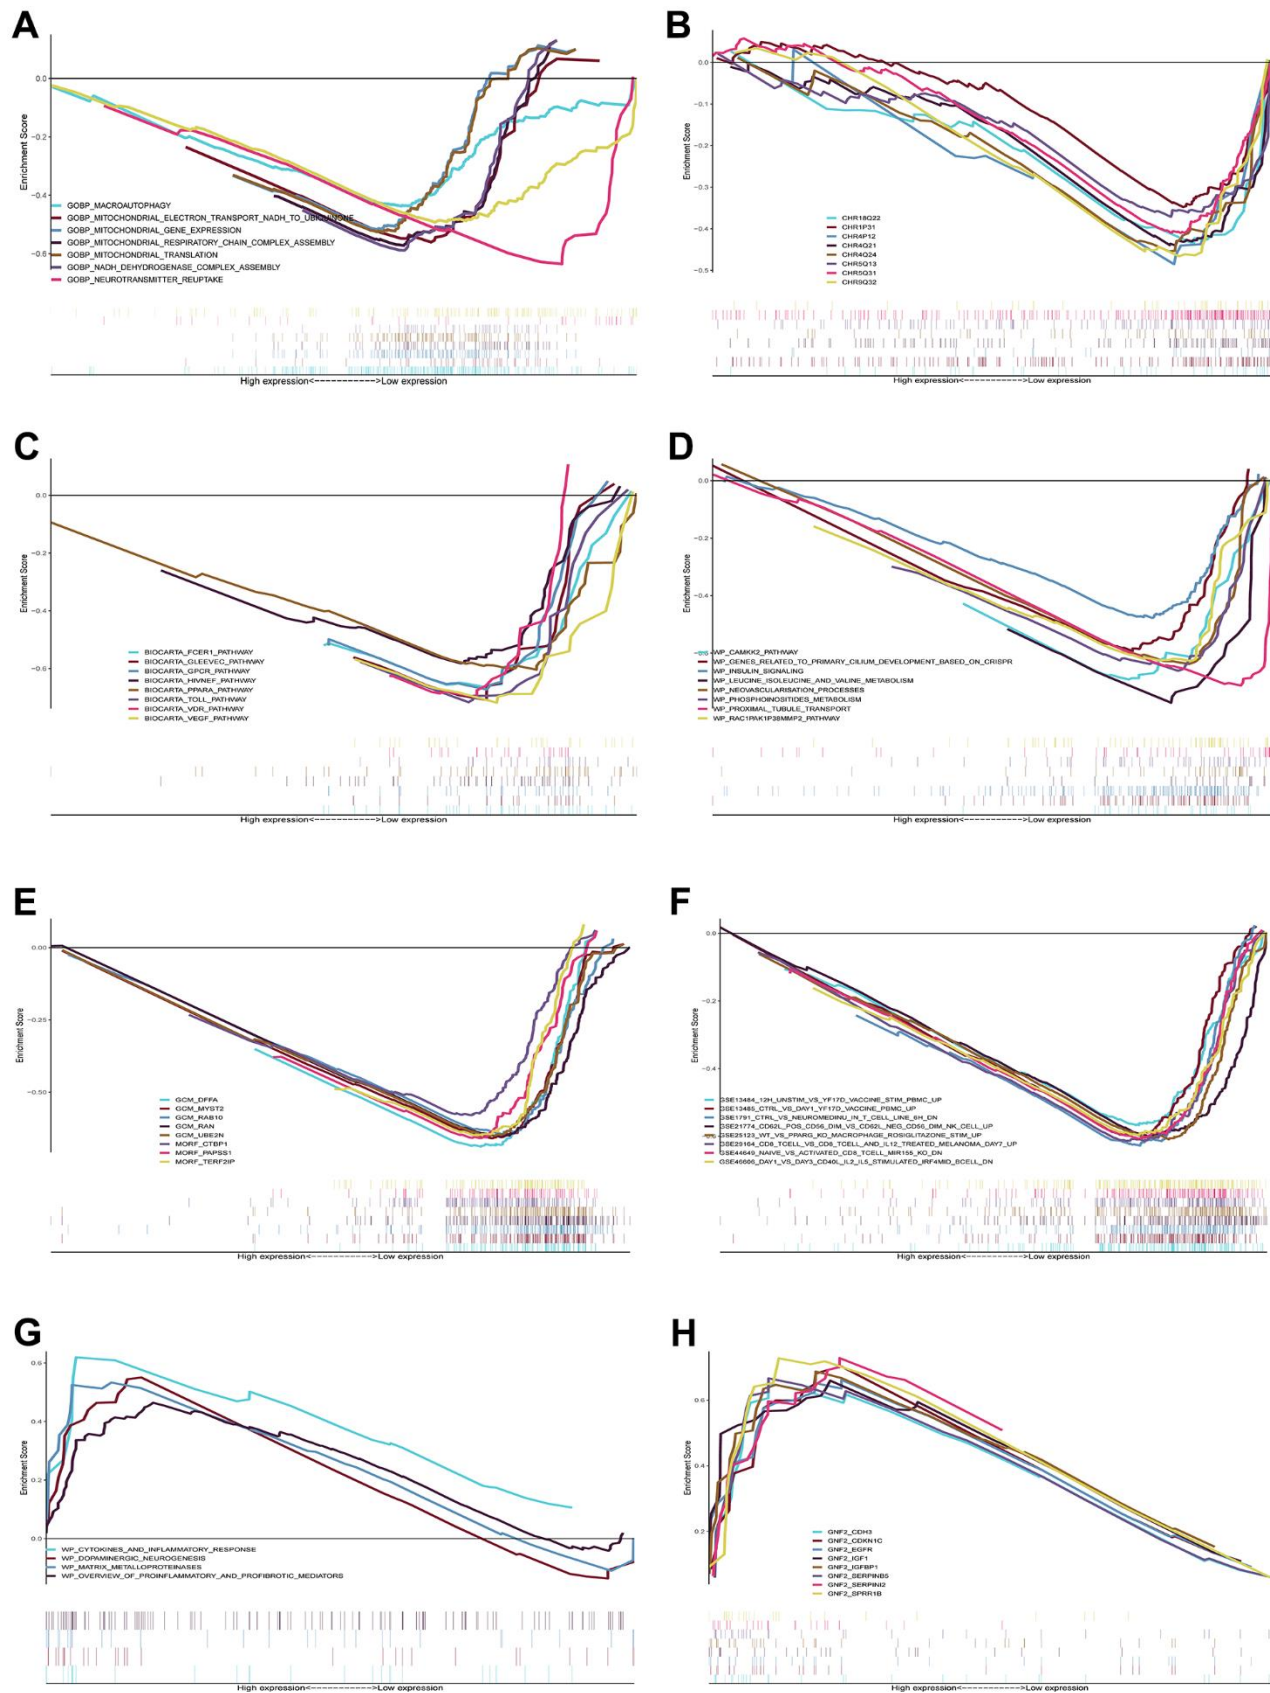

**Supplementary Figure 6. GSEA enrichment analysis.** Enrichment pathways in low-risk group in different gene sets (A–F); Enrichment pathways in high-risk group in different gene sets (G, H).

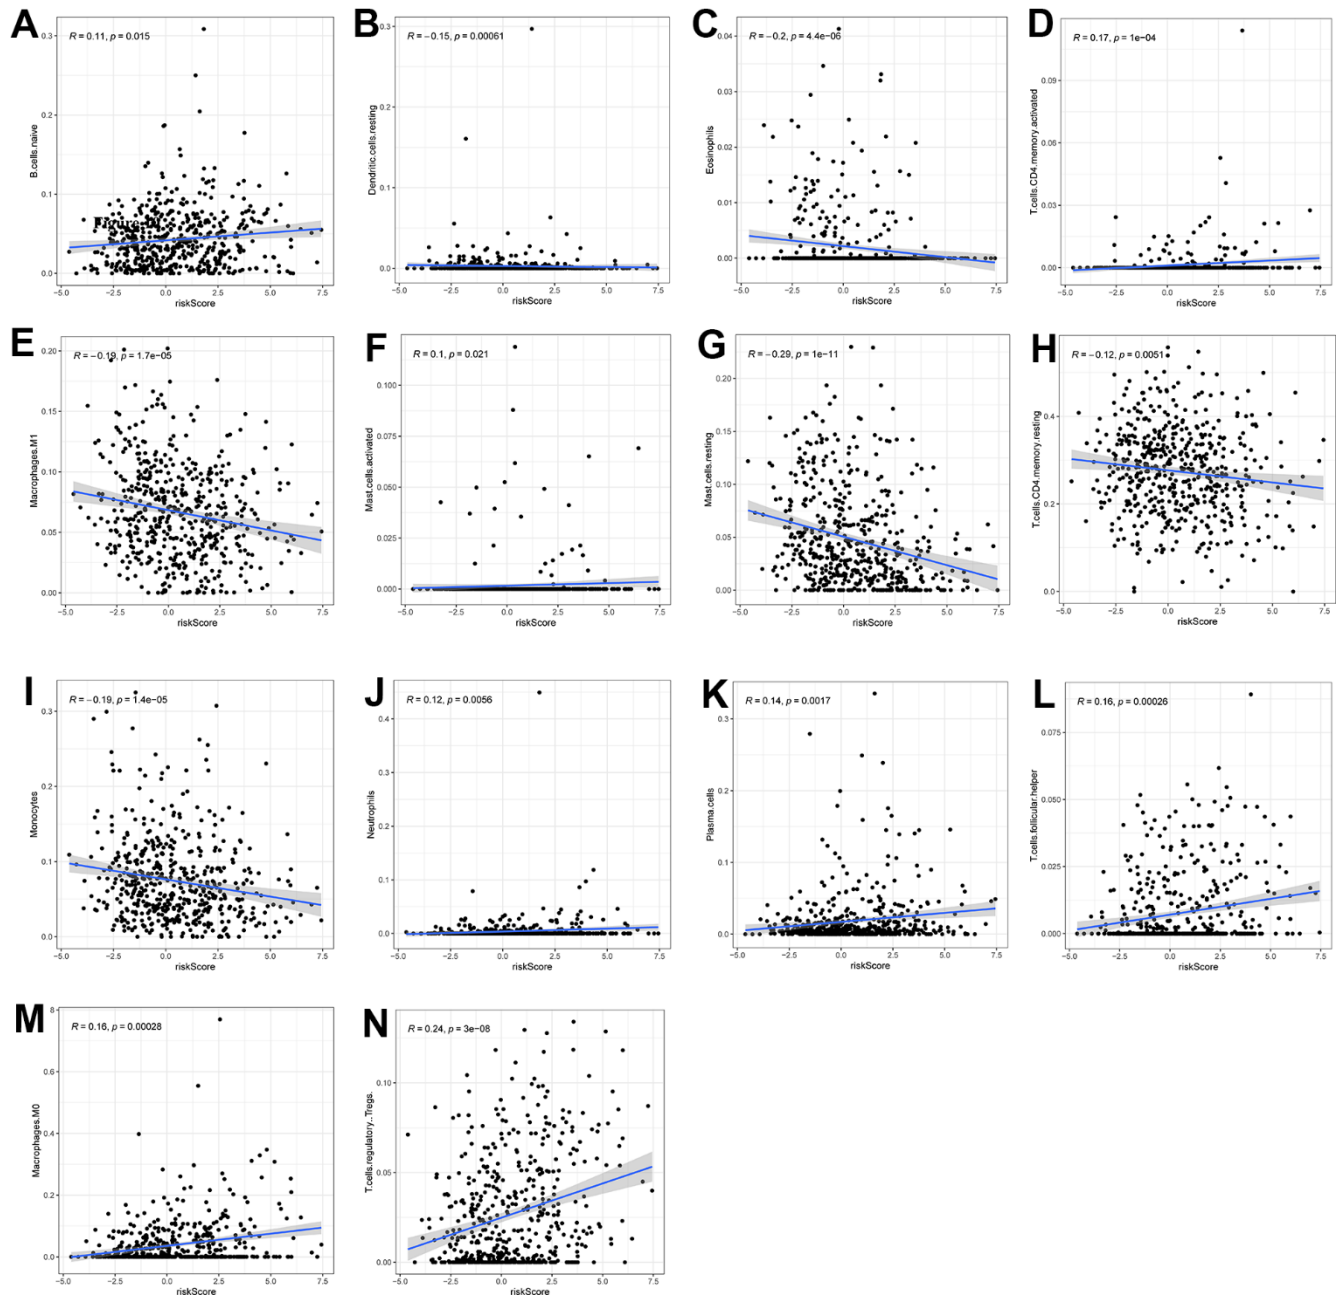

**Supplementary Figure 7. Correlation plot of risk scores with immune cells.** Scatter plot of the correlation between risk scores and naïve B cells (A), resting dendritic cells (B), eosinophils (C), activated CD4 memory T cells (D), macrophages M1 (E), activated mast cells (F), resting mast cells (G), resting CD4 memory T cells (H), monocytes (I), neutrophils (J), plasma cells (K), T follicular helper cells (L), macrophages M0 (M), regulatory T cells (Treg) (N).

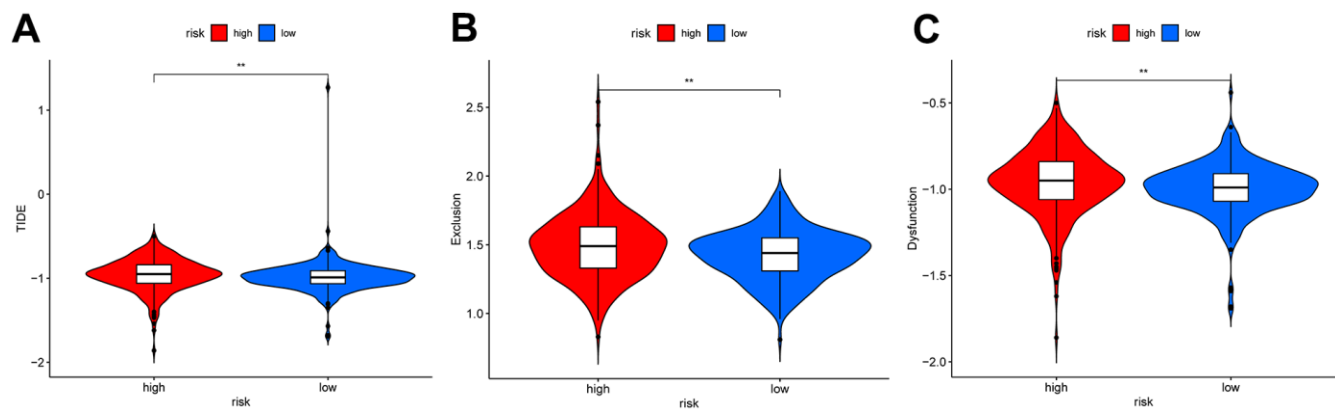

**Supplementary Figure 8. The ICD-relevant lncRNA risk pattern in tumor therapy.** Differences in TIDE (A) and immune exclusion (B) and dysfunction (C) in high and low-risk groups. \* $p < 0.05$ , \*\* $p < 0.01$ , \*\*\* $p < 0.001$ .

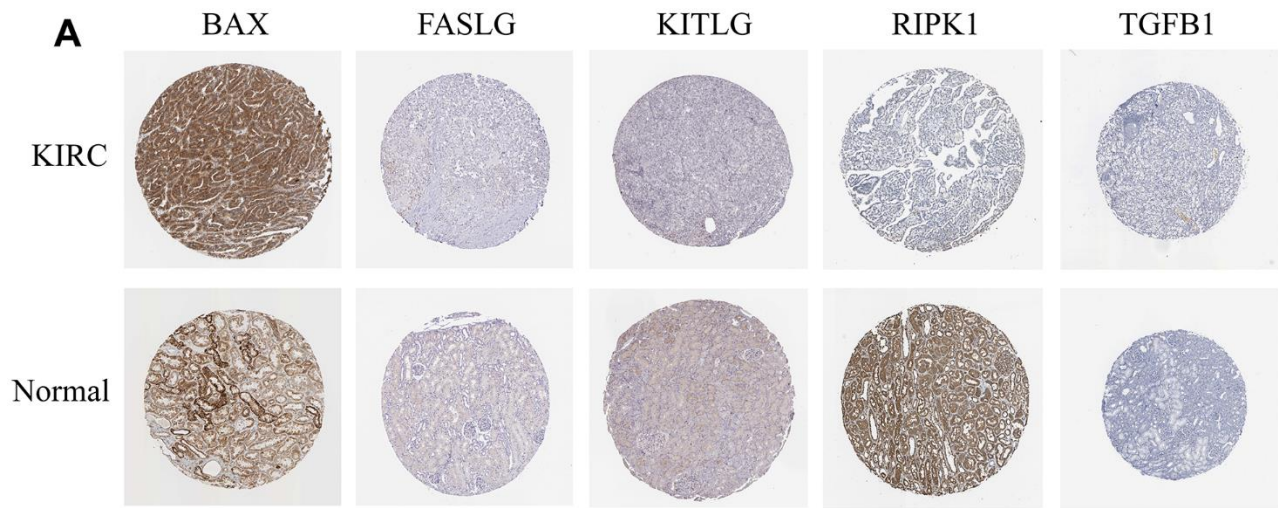

**B**

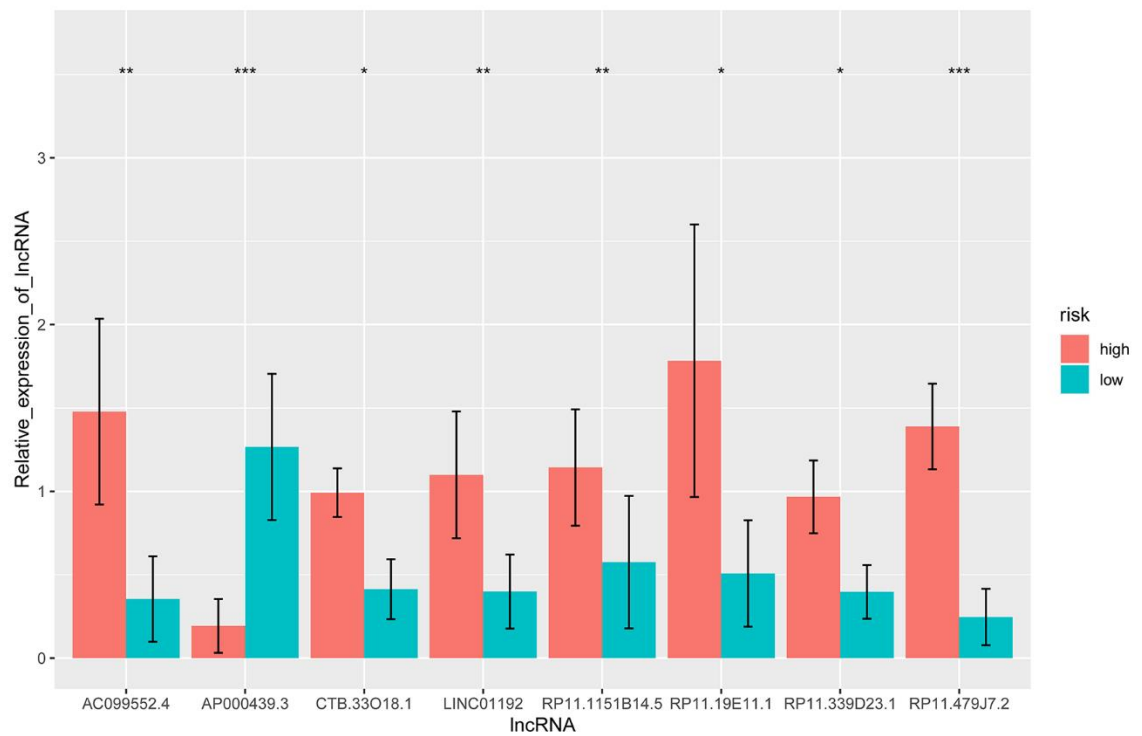

**Supplementary Figure 9. *In vitro* experimental validation of the risk model.** Immunohistochemical staining images of partial ICD-associated gene proteins in KIRC tissue and normal tissue (A); Relative expression of 8 ICD-related lncRNAs in different risk subgroups (B). \* $p < 0.05$ , \*\* $p < 0.01$ , \*\*\* $p < 0.001$ , \*\*\*\* $p < 0.0001$ .
